# Supplementary material for: Surface Roughening of Pt-Polystyrene Spherical Janus Micromotors for Enhanced Motion Speed
Source: MDPI journal article supplement (doi:10.3390/mi13040555), 2022-03-31
Supplement: s1 [file s1]

# Surface Roughening of Pt-Polystyrene Spherical Janus Micro-motors for Enhanced Motion Speed

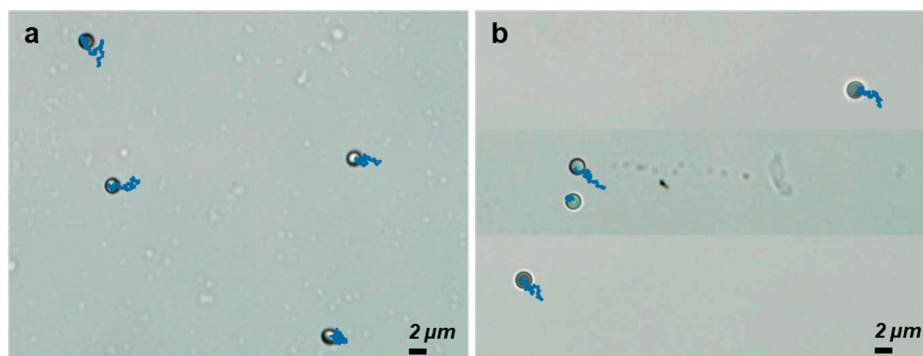

**Figure S1.** Optical images captured from the videos of (a) the Pt-PS SJMs and (b) the Pt-PS SJMs moving in water within 12 s. The blue curves represent the corresponding motion trajectories.
