# Supplementary material for: Surface Roughening of Pt-Polystyrene Spherical Janus Micromotors for Enhanced Motion Speed
Source: Micromachines (Basel). 2022 Mar 31;13(4):555. doi: 10.3390/mi13040555 (PMC9029801; doi:10.3390/mi13040555)
Supplement: Supplementary file 1 [file micromachines-13-00555-s001.zip]

Archive with 8 entries (8 files):
- Figure S1.pdf
- Video S1.avi
- Video S2.avi
- Video S3.avi
- Video S4.avi
- Video S5.avi
- Video S6.avi
- Video S7.avi
